# Supplementary material
Source: ML conference proceedings conference paper supplement (https://www.ecva.net/papers/eccv_2020/papers_ECCV/html/123610120_ECCV_2020_paper.php)
Supplement: Supplementary file 1 [file 123610120-supp.zip]

# 3D Fluid Flow Reconstruction Using Compact Light Field PIV Supplementary Material

Zhong Li<sup>1</sup>, Yu Ji<sup>2</sup>, Jingyi Yu<sup>2,3</sup>, and Jinwei Ye<sup>4</sup>

<sup>1</sup> University of Delaware, Newark, DE, USA

<sup>2</sup> DGene, Baton Rouge, LA, USA

<sup>3</sup> ShanghaiTech University, Shanghai, China

<sup>4</sup> Louisiana State University, Baton Rouge, LA, USA

In this supplementary document, we describe our optimization procedure to solve the 3D velocity field  $\mathbf{u} = [u, v, w]$  using Eq. 7.

We solve the optimization problem via variational method. Specifically, we take the derivative of  $\mathbf{u}$  in order to solve the problem with linear equations. Given an initial  $\mathbf{u}$ , our goal is to solve the incremental amount  $\Delta\mathbf{u}$  in each iteration. Our objective function  $E_{total}(\mathbf{u})$  is then become  $E_{total}(\Delta\mathbf{u})$ . We set out to find  $\Delta\mathbf{u} = [\Delta u, \Delta v, \Delta w]$  that minimizes the first-order gradients  $\frac{\partial E}{\partial u}$ ,  $\frac{\partial E}{\partial v}$ , and  $\frac{\partial E}{\partial w}$ .

To form a linear system, we unroll  $u$ ,  $v$ ,  $w$ ,  $u_{sol}$ ,  $v_{sol}$ ,  $w_{sol}$ ,  $\Delta u$ ,  $\Delta v$ , and  $\Delta w$  into column vectors. We use capitalized symbols  $U$ ,  $V$ ,  $W$ ,  $U_{sol}$ ,  $V_{sol}$ ,  $W_{sol}$ ,  $\Delta U$ ,  $\Delta V$ , and  $\Delta W$  to represent these column vectors. Let  $\Theta_{x,y,z}$  be the partial derivatives of  $\Theta_2(p + \mathbf{u})$  and  $\Theta_t = \Theta_2(p + \mathbf{u}) - \Theta_1$ . Let the  $\Theta_x = \text{diag}(\Theta_x)$ ,  $\Theta_y = \text{diag}(\Theta_y)$ ,  $\Theta_z = \text{diag}(\Theta_z)$  and  $\Theta_t = \text{diag}(\Theta_t)$  be the diagonal matrices where the diagonal values are vectorized volumes of  $\Theta_x$ ,  $\Theta_y$ ,  $\Theta_z$ , and  $\Theta_t$ . We can then form the linear system  $\mathcal{A}\mathbf{x} = \tilde{b}$  to solve  $\Delta\mathbf{u}$ , where  $\mathbf{x} = \Delta\mathbf{u}^T$ .

$$\mathcal{A} = \begin{bmatrix} \Theta_x^2 + \mathcal{F} & \Theta_x \Theta_y & \Theta_x \Theta_z \\ \Theta_x \Theta_y & \Theta_y^2 + \mathcal{F} & \Theta_y \Theta_z \\ \Theta_x \Theta_z & \Theta_y \Theta_z & \Theta_z^2 + \mathcal{F} \end{bmatrix} \quad (1)$$

$$\tilde{b} = \begin{bmatrix} -(\Theta_x \Theta_t + \mathcal{F}U - \lambda_2 F U_c - \lambda_3 F_{\mathbb{I}} U_{sol}) \\ -(\Theta_y \Theta_t + \mathcal{F}V - \lambda_2 F V_c - \lambda_3 F_{\mathbb{I}} V_{sol}) \\ -(\Theta_z \Theta_t + \mathcal{F}W - \lambda_2 F W_c - \lambda_3 F_{\mathbb{I}} W_{sol}) \end{bmatrix} \quad (2)$$

In our formulations,  $\mathcal{F} = \lambda_1 L + \lambda_2 F + \lambda_3 F_{\mathbb{I}}$ , where  $F_{\mathbb{I}}$  represents identity matrix and  $L$  is the Laplacian filter defined as  $L = D_x^T D_x + D_y^T D_y + D_z^T D_z$ .  $U_c$ ,  $V_c$  and  $W_c$  are the matrices computed by the sparse correspondence described in Section 3.2.

Furthermore, in order to improve the accuracy, we perform the optimization with a multi-layer coarse-to-fine scheme that uses the Gaussian pyramid. In our implementation, the initial value of  $\mathbf{u}$  is set to zero. We then update  $\mathbf{u}$  at each level by propagating  $\Delta\mathbf{u}$  from coarse to fine.
