# Supplementary material
Source: ML conference proceedings conference paper supplement (https://www.ecva.net/papers/eccv_2020/papers_ECCV/html/123610120_ECCV_2020_paper.php)
Supplement: Supplementary file 3 [file 123610120-supp.zip]

Archive with 10 entries (7 files):
- 2505-supp/
- 2505-supp/.DS_Store
- 2505-supp/2505_supp.pdf
- 2505-supp/supp_2505_video_results.avi
- __MACOSX/
- __MACOSX/._2505-supp
- __MACOSX/2505-supp/
- __MACOSX/2505-supp/._.DS_Store
- __MACOSX/2505-supp/._2505_supp.pdf
- __MACOSX/2505-supp/._supp_2505_video_results.mp4
